# Supplementary material
Source: PubMed Central journal article supplement (PMC10625846)
Supplement: NIHMS1940784-supplement-1.pdf [file NIHMS1940784-supplement-1.pdf]

### ■ ASSOCIATED CONTENT

#### SI Supporting Information

The Supporting Information is available free of charge at <https://pubs.acs.org/doi/10.1021/acscchembio.0c00093>.

Supporting figures, experimental procedures, and supporting tables (PDF)
